# Supplementary material
Source: publisher figshare collection journal article supplement (https://acs.figshare.com/ndownloader/files/4009375)
Supplement: Supplementary file 1 [file 4009375]

#     CCDC ELECTRONIC DATA DEPOSITION FORM (CIF)
#
#     This electronic data deposition form can be used:
#
#     (a) WHEN SUBMITTING A PAPER TO A JOURNAL FOR PUBLICATION or
#     (b) WHEN SUBMITTING A PRIVATE COMMUNICATION TO THE CCDC
#
#     A comprehensive archive of CIF resources is maintained by the IUCr
#     at its Chester office. This can be accessed
#     by anonymous ftp to ftp.iucr.org
#     or via the WWW at http://www.iucr.org/cif/home.html
#     If data items in this form are not available or not applicable
#     then ignore these items
#     A few items specific to CCDC input are indicated by _ccdc_
#
#     Submission and help information is provided at the end of this form
#-------------------------------------------------------------------------
#1    Global data block identification for start of deposition
 
data_global

_audit_update_record
;
2013-01-14 # Formatted by publCIF
;
 
#
#-------------------------------------------------------------------------
#2    Person making the deposition
#
_publ_contact_author               'Dr. Blacque, Olivier'
_publ_contact_author_email         oblacque@aci.uzh.ch
_publ_contact_author_fax           '+41 44 63 54 681'
_publ_contact_author_phone         '+41 44 63 54 651'
 
#-------------------------------------------------------------------------
#3    Publication details
#
#     Provide these details if the structure has been published,
#     accepted or submitted for publication
#
#     The CCDC journal deposition number, eg. 182/357,
#     should be included only if it has been assigned by the journal
#
#
#-------------------------------------------------------------------------
#4    Chemical and physical data
#
#     Note that the units for melting point are Kelvin
#     The compound_id is the identifier for the compound in the published
#       paper, eg. 4a, II, etc.
#     Provide a brief description of any significant biological activity,
#       eg. antimalarial activity
#     If the compound exhibits polymorphism provide brief details,
#       eg. monoclinic form, low-temperature phase, etc.
#     For chemdiag  leave blank - no longer necessary

#
#-------------------------------------------------------------------------
#5    Other data relating to the structure determination and refinement
#
#     Record the radiation type if not X-rays, eg. neutron
#     Record the temperature of the data collection (Kelvin)
#       if not room-temperature
#     Record R_squared if this is the only reliability factor given by
#       your refinement program
#     Describe briefly any disorder, eg. t-Butyl C31-33 disordered over
#       two sites with occupancies 0.6 and 0.4
#     Under ccdc_comments record any other important information
#-------------------------------------------------------------------------
#6    Include your "standard" CIF file here
#     It should contain the following data items:
#       unit cell parameters and volume, z value, space group symbol,
#       R-factor(s), atomic coordinates with standard deviations,
#       occupancy factors, bond lengths and bond angles
#     Other data items may be present but will not necessarily be
#       included in the Cambridge Structural Database
#
#     Do NOT include structure factors
#
#
#-------------------------------------------------------------------------
#SUBMISSION INFORMATION
#
#     For a journal send the form to the address specified by the journal
#
#     For a private communication to the CCDC send the form to the address
#       deposit@ccdc.cam.ac.uk
#
#     For up-to-date information on deposition procedures, check the website
#       http://www.ccdc.cam.ac.uk/

_publ_section_comment
;
(type here to add)
;

_publ_section_abstract
;
(type here to add abstract)
;

_publ_contact_letter
;
Please consider this CIF for publication. I certify that this contibution is the
original work of those listed as authors; that it has not been published
before (in any language or medium) and is not being considered for publication
elsewhere; that all authors concur with and are aware of the submission; that
all workers involved in the study are listed as authors or given proper credit
in the acknowledgements; that I have obtained permission for and acknowledged
the source of any excerpts from other copyright works; and that to the best of
my knowledge the paper contains no statements which are libellous, unlawful or
in any way actionable. All coauthors have made significant scientific
contributions to the work reported, including the ideas and their execution,
and share responsibility and accountability for the results.
;
   
_publ_requested_journal      'ACS Catalysis'  

# TITLE AND AUTHOR LIST

_publ_section_title
;
A Highly Efficient Large Bite Angle Diphosphine Substituted 
Molybdenum Catalyst for Hydrosilylation
;    
 
loop_
_publ_author_name
_publ_author_address
'Chakraborty, Subrata'
;
Anorganisch-chemisches Institut, Universit\"at Z\"urich, Winterthurerstr. 190,
 CH-8037, Z\"urich, Switzerland
;
'Blacque, Olivier'
;
Anorganisch-chemisches Institut, Universit\"at Z\"urich, Winterthurerstr. 190,
 CH-8037, Z\"urich, Switzerland
;
'Fox, Thomas'    
;
Anorganisch-chemisches Institut, Universit\"at Z\"urich, Winterthurerstr. 190,
 CH-8037, Z\"urich, Switzerland
;
'Berke, Heinz' #Corresponding author of the paper     
;
Anorganisch-chemisches Institut, Universit\"at Z\"urich, Winterthurerstr. 190,
 CH-8037, Z\"urich, Switzerland
;
#----------------------------------------------------------------------------#
 
data_7(CCDC-921397) 

_audit_creation_method            SHELXL-97 
_chemical_name_systematic 
;\
Chloro[(2-{[2'-(diphenylphosphanyl-\k<i>P</i>)biphenyl-2-yl]oxy-\k<i>O</i>}\
phenyl)(diphenyl)phosphane-\k<i>P</i>](nitrosyl)(triphenylphosphane)\
molybdenum
; 
_chemical_name_common             ? 
_chemical_formula_moiety          'C54 H43 Cl Mo N O2 P3'
_chemical_formula_sum             'C54 H43 Cl Mo N O2 P3'
_chemical_formula_weight          962.19
 
loop_
 _atom_type_symbol
 _atom_type_description
 _atom_type_scat_dispersion_real
 _atom_type_scat_dispersion_imag
 _atom_type_scat_source
 'C'  'C'   0.0033   0.0016
 'International Tables Vol C Tables 4.2.6.8 and 6.1.1.4'
 'H'  'H'   0.0000   0.0000
 'International Tables Vol C Tables 4.2.6.8 and 6.1.1.4'
 'N'  'N'   0.0061   0.0033
 'International Tables Vol C Tables 4.2.6.8 and 6.1.1.4'
 'O'  'O'   0.0106   0.0060
 'International Tables Vol C Tables 4.2.6.8 and 6.1.1.4'
 'P'  'P'   0.1023   0.0942
 'International Tables Vol C Tables 4.2.6.8 and 6.1.1.4'
 'Cl'  'Cl'   0.1484   0.1585
 'International Tables Vol C Tables 4.2.6.8 and 6.1.1.4'
 'Mo'  'Mo'  -1.6832   0.6857
 'International Tables Vol C Tables 4.2.6.8 and 6.1.1.4'
 
_symmetry_cell_setting            monoclinic
_symmetry_space_group_name_H-M    'P 21/n'
_symmetry_space_group_name_Hall   '-P 2yn'
 
loop_
 _symmetry_equiv_pos_as_xyz
 'x, y, z'
 '-x+1/2, y+1/2, -z+1/2'
 '-x, -y, -z'
 'x-1/2, -y-1/2, z-1/2'
 
_cell_length_a                    19.3956(3)
_cell_length_b                    12.6738(2)
_cell_length_c                    20.4746(3)
_cell_angle_alpha                 90.00
_cell_angle_beta                  114.639(2)
_cell_angle_gamma                 90.00
_cell_volume                      4574.74(14)
_cell_formula_units_Z             4
_cell_measurement_temperature     183(2)
_cell_measurement_reflns_used     48199
_cell_measurement_theta_min       2.56
_cell_measurement_theta_max       32.78
 
_exptl_crystal_description        block
_exptl_crystal_colour             orange
_exptl_crystal_size_max           0.44
_exptl_crystal_size_mid           0.34
_exptl_crystal_size_min           0.20
_exptl_crystal_density_meas       ?
_exptl_crystal_density_diffrn     1.397
_exptl_crystal_density_method     'not measured'
_exptl_crystal_F_000              1976
_exptl_absorpt_coefficient_mu     0.493
_exptl_absorpt_correction_T_min   0.870
_exptl_absorpt_correction_T_max   0.935
_exptl_absorpt_correction_type    analytical
_exptl_absorpt_process_details
;
CrysAlisPro, Version 1.171.33.55 (Oxford Diffraction, 2010)
Analytical numeric absorption correction using a multifaceted crystal
model based on expressions derived by R.C. Clark & J.S. Reid.
(Clark, R. C. & Reid, J. S. (1995). Acta Cryst. A51, 887-897)
;
 
_exptl_special_details
;
The <i>trans</i> NO and Cl ligands are positionally disordered over two sets of
positions with site occupancy factors of 0.764:0.236(1). Some <i>SHELXL</i>
similarity restraints were used to correct the geometry of the disordered
ligands and the thermal parameters of the corresponding atoms. All hydrogen
positions were calculated after each cycle of refinement using a riding model,
with C---H = 0.93\%A and <i>U</i>~iso~(H) = 1.2<i>U</i>~eq~(C) for the
aromatic H atoms.
;
 
_diffrn_ambient_temperature       183(2)
_diffrn_radiation_wavelength      0.71073
_diffrn_radiation_type            MoK\a
_diffrn_radiation_source          'Enhance (Mo) X-ray Source'
_diffrn_radiation_monochromator   graphite
_diffrn_measurement_device_type
; Goniometer Xcalibur, detector: Ruby
Oxford Diffraction (2007). Oxford Diffraction Ltd.,
Xcalibur CCD system
;
_diffrn_measurement_method        'omega scans'
_diffrn_detector_area_resol_mean  10.4498
_diffrn_standards_number           0
_diffrn_standards_interval_count   .
_diffrn_standards_interval_time    .
_diffrn_standards_decay_%          .
_diffrn_reflns_number             96389
_diffrn_reflns_av_R_equivalents   0.0307
_diffrn_reflns_av_sigmaI/netI     0.0222
_diffrn_reflns_limit_h_min        -27
_diffrn_reflns_limit_h_max        27
_diffrn_reflns_limit_k_min        -18
_diffrn_reflns_limit_k_max        18
_diffrn_reflns_limit_l_min        -29
_diffrn_reflns_limit_l_max        29
_diffrn_reflns_theta_min          2.57
_diffrn_reflns_theta_max          30.51
_reflns_number_total              13957
_reflns_number_gt                 11579
_reflns_threshold_expression      >2sigma(I)
 
_computing_data_collection
;
CrysAlisPro, Version 1.171.33.55 (Oxford Diffraction, 2010).
;
_computing_cell_refinement
;
CrysAlisPro, Version 1.171.33.55 (Oxford Diffraction, 2010).
;
_computing_data_reduction
;
CrysAlisPro, Version 1.171.33.55 (Oxford Diffraction, 2010).
;
_computing_structure_solution
; SHELXS97. Program for Crystal Structure solution.
  Sheldrick, G.M. (2008). Acta Cryst. A64, 112-122.  
;
_computing_structure_refinement
; SHELXL97. Program for crystal structure refinement.
  Sheldrick, G.M. (2008). Acta Cryst. A64, 112-122.
;
_computing_molecular_graphics
; ORTEP-3 for Windows.
  Farrugia, L. J. (1997). J. Appl. Cryst. 30, 565.
;
_computing_publication_material
; WinGX -- Farrugia, L. J. (1999). J. Appl. Cryst. 32, 837-838.
 SHELXL97 -- Sheldrick, G. M (2008). Acta Cryst. A64, 112-122.
 PLATON for Windows -- Spek, A. L. (2003). J. Appl. Cryst. 36, 7-13. 
;
 
_refine_special_details 
; 
 Refinement of F^2^ against ALL reflections.  The weighted R-factor wR and 
 goodness of fit S are based on F^2^, conventional R-factors R are based 
 on F, with F set to zero for negative F^2^. The threshold expression of 
 F^2^ > 2sigma(F^2^) is used only for calculating R-factors(gt) etc. and is 
 not relevant to the choice of reflections for refinement.  R-factors based 
 on F^2^ are statistically about twice as large as those based on F, and R- 
 factors based on ALL data will be even larger. 
; 
 
_refine_ls_structure_factor_coef  Fsqd
_refine_ls_matrix_type            full
_refine_ls_weighting_scheme       calc
_refine_ls_weighting_details
 'w=1/[\s^2^(Fo^2^)+(0.0396P)^2^+0.4880P] where P=(Fo^2^+2Fc^2^)/3'
_atom_sites_solution_primary      direct
_atom_sites_solution_secondary    difmap
_atom_sites_solution_hydrogens    geom
_refine_ls_hydrogen_treatment     constr
_refine_ls_extinction_method      none
_refine_ls_extinction_coef        ?
_refine_ls_number_reflns          13957
_refine_ls_number_parameters      569
_refine_ls_number_restraints      4
_refine_ls_R_factor_all           0.0361
_refine_ls_R_factor_gt            0.0270
_refine_ls_wR_factor_ref          0.0733
_refine_ls_wR_factor_gt           0.0714
_refine_ls_goodness_of_fit_ref    1.080
_refine_ls_restrained_S_all       1.082
_refine_ls_shift/su_max           0.001
_refine_ls_shift/su_mean          0.000
 
loop_
 _atom_site_label
 _atom_site_type_symbol
 _atom_site_fract_x
 _atom_site_fract_y
 _atom_site_fract_z
 _atom_site_U_iso_or_equiv
 _atom_site_adp_type
 _atom_site_occupancy
 _atom_site_symmetry_multiplicity
 _atom_site_calc_flag
 _atom_site_refinement_flags
 _atom_site_disorder_assembly
 _atom_site_disorder_group
C1 C 0.31374(7) 0.31489(11) 0.69191(7) 0.0248(3) Uani 1 1 d . . .
C2 C 0.29005(7) 0.23292(11) 0.72333(7) 0.0280(3) Uani 1 1 d . . .
H2 H 0.2392 0.2132 0.7039 0.034 Uiso 1 1 calc R . .
C3 C 0.34145(8) 0.18101(12) 0.78297(8) 0.0354(3) Uani 1 1 d . . .
H3 H 0.3249 0.1279 0.8043 0.043 Uiso 1 1 calc R . .
C4 C 0.41759(8) 0.20771(13) 0.81113(9) 0.0403(4) Uani 1 1 d . . .
H4 H 0.4521 0.1732 0.8517 0.048 Uiso 1 1 calc R . .
C5 C 0.44207(8) 0.28562(13) 0.77886(9) 0.0384(4) Uani 1 1 d . . .
H5 H 0.4934 0.3022 0.7970 0.046 Uiso 1 1 calc R . .
C6 C 0.39072(7) 0.33964(12) 0.71947(8) 0.0311(3) Uani 1 1 d . . .
H6 H 0.4077 0.3923 0.6981 0.037 Uiso 1 1 calc R . .
C7 C 0.16334(7) 0.39981(11) 0.63571(7) 0.0252(3) Uani 1 1 d . . .
C8 C 0.17202(8) 0.40788(11) 0.70646(8) 0.0305(3) Uani 1 1 d . . .
H8 H 0.2200 0.4013 0.7439 0.037 Uiso 1 1 calc R . .
C9 C 0.10954(9) 0.42570(12) 0.72166(9) 0.0385(4) Uani 1 1 d . . .
H9 H 0.1159 0.4307 0.7692 0.046 Uiso 1 1 calc R . .
C10 C 0.03851(9) 0.43590(13) 0.66710(10) 0.0438(4) Uani 1 1 d . . .
H10 H -0.0032 0.4474 0.6775 0.053 Uiso 1 1 calc R . .
C11 C 0.02934(9) 0.42911(16) 0.59722(10) 0.0497(4) Uani 1 1 d . . .
H11 H -0.0188 0.4367 0.5602 0.060 Uiso 1 1 calc R . .
C12 C 0.09094(8) 0.41106(14) 0.58100(8) 0.0381(3) Uani 1 1 d . . .
H12 H 0.0838 0.4065 0.5333 0.046 Uiso 1 1 calc R . .
C13 C 0.28166(7) 0.51564(11) 0.62023(7) 0.0266(3) Uani 1 1 d . . .
C14 C 0.31583(8) 0.56925(12) 0.68570(8) 0.0338(3) Uani 1 1 d . . .
H14 H 0.3173 0.5378 0.7273 0.041 Uiso 1 1 calc R . .
C15 C 0.34763(9) 0.66864(12) 0.68976(9) 0.0407(4) Uani 1 1 d . . .
H15 H 0.3703 0.7030 0.7338 0.049 Uiso 1 1 calc R . .
C16 C 0.34553(9) 0.71618(13) 0.62848(10) 0.0407(4) Uani 1 1 d . . .
H16 H 0.3673 0.7824 0.6314 0.049 Uiso 1 1 calc R . .
C17 C 0.31103(9) 0.66594(11) 0.56201(9) 0.0352(3) Uani 1 1 d . . .
H17 H 0.3098 0.6977 0.5206 0.042 Uiso 1 1 calc R . .
C18 C 0.27846(7) 0.56730(11) 0.55907(8) 0.0280(3) Uani 1 1 d . . .
C19 C 0.21063(7) 0.51204(11) 0.36840(7) 0.0256(3) Uani 1 1 d . . .
C20 C 0.17352(8) 0.56074(12) 0.30141(8) 0.0333(3) Uani 1 1 d . . .
H20 H 0.1740 0.5288 0.2607 0.040 Uiso 1 1 calc R . .
C21 C 0.13587(9) 0.65653(13) 0.29493(10) 0.0418(4) Uani 1 1 d . . .
H21 H 0.1120 0.6885 0.2502 0.050 Uiso 1 1 calc R . .
C22 C 0.13399(9) 0.70365(13) 0.35442(10) 0.0446(4) Uani 1 1 d . . .
H22 H 0.1081 0.7670 0.3496 0.053 Uiso 1 1 calc R . .
C23 C 0.17027(9) 0.65782(12) 0.42184(9) 0.0377(3) Uani 1 1 d . . .
H23 H 0.1685 0.6892 0.4622 0.045 Uiso 1 1 calc R . .
C24 C 0.20932(7) 0.56400(11) 0.42757(8) 0.0282(3) Uani 1 1 d . . .
C25 C 0.20075(7) 0.32916(10) 0.28786(7) 0.0257(3) Uani 1 1 d . . .
C26 C 0.12395(8) 0.30366(13) 0.26366(8) 0.0339(3) Uani 1 1 d . . .
H26 H 0.1008 0.3061 0.2953 0.041 Uiso 1 1 calc R . .
C27 C 0.08212(9) 0.27476(13) 0.19260(8) 0.0396(4) Uani 1 1 d . . .
H27 H 0.0310 0.2578 0.1768 0.047 Uiso 1 1 calc R . .
C28 C 0.11604(10) 0.27114(13) 0.14555(8) 0.0414(4) Uani 1 1 d . . .
H28 H 0.0876 0.2530 0.0977 0.050 Uiso 1 1 calc R . .
C29 C 0.19200(10) 0.29433(14) 0.16904(8) 0.0416(4) Uani 1 1 d . . .
H29 H 0.2149 0.2907 0.1372 0.050 Uiso 1 1 calc R . .
C30 C 0.23457(8) 0.32318(12) 0.24035(8) 0.0331(3) Uani 1 1 d . . .
H30 H 0.2859 0.3385 0.2561 0.040 Uiso 1 1 calc R . .
C31 C 0.34831(7) 0.39590(11) 0.39233(6) 0.0230(2) Uani 1 1 d . . .
C32 C 0.38005(7) 0.49493(11) 0.39615(7) 0.0267(3) Uani 1 1 d . . .
H32 H 0.3502 0.5549 0.3897 0.032 Uiso 1 1 calc R . .
C33 C 0.45623(8) 0.50532(13) 0.40959(8) 0.0343(3) Uani 1 1 d . . .
H33 H 0.4773 0.5721 0.4127 0.041 Uiso 1 1 calc R . .
C34 C 0.50048(8) 0.41719(14) 0.41822(8) 0.0369(4) Uani 1 1 d . . .
H34 H 0.5512 0.4243 0.4266 0.044 Uiso 1 1 calc R . .
C35 C 0.46966(9) 0.31859(14) 0.41450(9) 0.0410(4) Uani 1 1 d . . .
H35 H 0.4996 0.2591 0.4199 0.049 Uiso 1 1 calc R . .
C36 C 0.39412(8) 0.30709(13) 0.40266(9) 0.0383(3) Uani 1 1 d . . .
H36 H 0.3741 0.2401 0.4016 0.046 Uiso 1 1 calc R . .
C37 C 0.18346(8) 0.08246(11) 0.54949(7) 0.0293(3) Uani 1 1 d . . .
C38 C 0.12457(9) 0.13858(14) 0.55485(8) 0.0382(3) Uani 1 1 d . . .
H38 H 0.1139 0.2068 0.5365 0.046 Uiso 1 1 calc R . .
C39 C 0.08130(11) 0.09366(17) 0.58739(10) 0.0537(5) Uani 1 1 d . . .
H39 H 0.0418 0.1317 0.5905 0.064 Uiso 1 1 calc R . .
C40 C 0.09677(11) -0.00646(19) 0.61480(10) 0.0619(6) Uani 1 1 d . . .
H40 H 0.0676 -0.0364 0.6362 0.074 Uiso 1 1 calc R . .
C41 C 0.15539(11) -0.06283(17) 0.61068(10) 0.0598(6) Uani 1 1 d . . .
H41 H 0.1659 -0.1306 0.6297 0.072 Uiso 1 1 calc R . .
C42 C 0.19916(9) -0.01872(14) 0.57805(8) 0.0419(4) Uani 1 1 d . . .
H42 H 0.2388 -0.0571 0.5755 0.050 Uiso 1 1 calc R . .
C43 C 0.32184(8) 0.06922(10) 0.53313(7) 0.0265(3) Uani 1 1 d . . .
C44 C 0.37053(8) 0.08794(11) 0.60505(8) 0.0307(3) Uani 1 1 d . . .
H44 H 0.3555 0.1334 0.6323 0.037 Uiso 1 1 calc R . .
C45 C 0.44080(8) 0.03958(12) 0.63607(8) 0.0365(3) Uani 1 1 d . . .
H45 H 0.4722 0.0518 0.6842 0.044 Uiso 1 1 calc R . .
C46 C 0.46455(9) -0.02639(15) 0.59620(10) 0.0484(4) Uani 1 1 d . . .
H46 H 0.5120 -0.0582 0.6170 0.058 Uiso 1 1 calc R . .
C47 C 0.41742(11) -0.04500(16) 0.52507(10) 0.0574(5) Uani 1 1 d . . .
H47 H 0.4335 -0.0888 0.4977 0.069 Uiso 1 1 calc R . .
C48 C 0.34624(10) 0.00131(14) 0.49416(9) 0.0433(4) Uani 1 1 d . . .
H48 H 0.3144 -0.0135 0.4465 0.052 Uiso 1 1 calc R . .
C49 C 0.17616(8) 0.07581(10) 0.41006(7) 0.0273(3) Uani 1 1 d . . .
C50 C 0.10932(8) 0.02025(12) 0.39554(8) 0.0331(3) Uani 1 1 d . . .
H50 H 0.0919 0.0120 0.4313 0.040 Uiso 1 1 calc R . .
C51 C 0.06859(9) -0.02291(13) 0.32784(8) 0.0424(4) Uani 1 1 d . . .
H51 H 0.0237 -0.0591 0.3184 0.051 Uiso 1 1 calc R . .
C52 C 0.09385(11) -0.01275(13) 0.27467(8) 0.0467(4) Uani 1 1 d . . .
H52 H 0.0667 -0.0429 0.2298 0.056 Uiso 1 1 calc R . .
C53 C 0.15974(11) 0.04252(13) 0.28826(8) 0.0461(4) Uani 1 1 d . . .
H53 H 0.1771 0.0496 0.2524 0.055 Uiso 1 1 calc R . .
C54 C 0.19996(9) 0.08737(12) 0.35500(8) 0.0357(3) Uani 1 1 d . . .
H54 H 0.2436 0.1259 0.3633 0.043 Uiso 1 1 calc R . .
O1 O 0.24512(5) 0.51140(8) 0.49391(5) 0.0304(2) Uani 1 1 d . A .
P1 P 0.244314(18) 0.37984(3) 0.612334(18) 0.02253(7) Uani 1 1 d . A .
P2 P 0.250583(17) 0.37729(3) 0.380541(17) 0.02170(7) Uani 1 1 d . A .
P3 P 0.231177(19) 0.14046(3) 0.496856(17) 0.02211(7) Uani 1 1 d . A .
Cl1A Cl 0.38317(11) 0.33726(16) 0.56072(10) 0.03001(11) Uani 0.2356(11) 1 d PD
 A 1
N1A N 0.1440(2) 0.3334(4) 0.4484(2) 0.0217(3) Uani 0.2356(11) 1 d PD A 1
O1A O 0.0764(2) 0.3326(5) 0.4161(3) 0.0340(3) Uani 0.2356(11) 1 d PD A 1
Cl1B Cl 0.10327(3) 0.34932(4) 0.42368(3) 0.03001(11) Uani 0.7644(11) 1 d PD A 2
N1B N 0.34271(8) 0.32231(11) 0.53987(7) 0.0217(3) Uani 0.7644(11) 1 d PD A 2
O1B O 0.41111(9) 0.31633(13) 0.56930(8) 0.0340(3) Uani 0.7644(11) 1 d PD A 2
Mo1 Mo 0.242622(5) 0.330661(8) 0.495036(5) 0.01816(3) Uani 1 1 d D . .
 
loop_
 _atom_site_aniso_label
 _atom_site_aniso_U_11
 _atom_site_aniso_U_22
 _atom_site_aniso_U_33
 _atom_site_aniso_U_23
 _atom_site_aniso_U_13
 _atom_site_aniso_U_12
C1 0.0215(6) 0.0242(7) 0.0271(6) -0.0068(5) 0.0084(5) 0.0013(5)
C2 0.0224(6) 0.0225(7) 0.0355(7) -0.0036(5) 0.0086(5) 0.0009(5)
C3 0.0319(7) 0.0244(7) 0.0438(8) 0.0030(6) 0.0097(6) 0.0042(6)
C4 0.0298(7) 0.0321(8) 0.0446(8) 0.0001(7) 0.0011(6) 0.0085(6)
C5 0.0197(6) 0.0345(9) 0.0511(9) -0.0117(7) 0.0049(6) 0.0020(6)
C6 0.0230(6) 0.0295(8) 0.0413(8) -0.0083(6) 0.0139(6) -0.0018(5)
C7 0.0238(6) 0.0213(6) 0.0327(7) -0.0002(5) 0.0140(5) 0.0013(5)
C8 0.0328(7) 0.0272(7) 0.0345(7) 0.0036(6) 0.0169(6) 0.0072(6)
C9 0.0512(9) 0.0293(8) 0.0502(9) 0.0080(7) 0.0361(8) 0.0087(7)
C10 0.0372(8) 0.0378(9) 0.0702(12) 0.0035(8) 0.0360(8) 0.0041(7)
C11 0.0248(7) 0.0596(12) 0.0614(11) -0.0031(9) 0.0146(7) 0.0061(7)
C12 0.0280(7) 0.0474(10) 0.0368(8) -0.0032(7) 0.0113(6) 0.0056(6)
C13 0.0253(6) 0.0211(7) 0.0362(7) -0.0060(5) 0.0157(5) -0.0015(5)
C14 0.0352(7) 0.0298(8) 0.0395(8) -0.0104(6) 0.0187(6) -0.0038(6)
C15 0.0420(8) 0.0310(8) 0.0500(9) -0.0184(7) 0.0201(7) -0.0080(7)
C16 0.0400(8) 0.0245(8) 0.0640(11) -0.0130(7) 0.0279(8) -0.0093(6)
C17 0.0395(8) 0.0213(7) 0.0516(9) -0.0033(6) 0.0258(7) -0.0023(6)
C18 0.0278(6) 0.0214(7) 0.0381(7) -0.0050(5) 0.0169(6) 0.0004(5)
C19 0.0198(5) 0.0224(7) 0.0353(7) 0.0062(5) 0.0121(5) 0.0014(5)
C20 0.0291(7) 0.0308(8) 0.0386(8) 0.0093(6) 0.0126(6) 0.0019(6)
C21 0.0351(8) 0.0356(9) 0.0500(9) 0.0195(7) 0.0130(7) 0.0087(6)
C22 0.0372(8) 0.0284(8) 0.0686(11) 0.0145(8) 0.0224(8) 0.0137(7)
C23 0.0374(8) 0.0259(8) 0.0547(10) 0.0057(7) 0.0241(7) 0.0075(6)
C24 0.0272(6) 0.0196(6) 0.0394(7) 0.0049(5) 0.0155(6) 0.0013(5)
C25 0.0252(6) 0.0225(7) 0.0263(6) 0.0031(5) 0.0075(5) -0.0001(5)
C26 0.0249(6) 0.0366(8) 0.0361(7) -0.0005(6) 0.0088(6) -0.0031(6)
C27 0.0286(7) 0.0352(9) 0.0413(8) -0.0016(7) 0.0011(6) 0.0000(6)
C28 0.0474(9) 0.0326(9) 0.0289(7) -0.0006(6) 0.0008(7) 0.0033(7)
C29 0.0510(9) 0.0435(10) 0.0311(7) -0.0007(7) 0.0179(7) 0.0012(8)
C30 0.0325(7) 0.0344(8) 0.0326(7) 0.0009(6) 0.0138(6) -0.0013(6)
C31 0.0199(5) 0.0262(7) 0.0222(6) 0.0018(5) 0.0081(5) 0.0005(5)
C32 0.0229(6) 0.0278(7) 0.0290(6) 0.0006(5) 0.0106(5) -0.0010(5)
C33 0.0255(6) 0.0391(9) 0.0374(7) -0.0008(6) 0.0123(6) -0.0082(6)
C34 0.0197(6) 0.0566(11) 0.0326(7) -0.0003(7) 0.0089(5) 0.0018(6)
C35 0.0276(7) 0.0422(10) 0.0520(9) 0.0028(7) 0.0152(7) 0.0119(6)
C36 0.0292(7) 0.0284(8) 0.0554(10) 0.0037(7) 0.0157(7) 0.0038(6)
C37 0.0313(7) 0.0313(8) 0.0218(6) 0.0002(5) 0.0076(5) -0.0124(6)
C38 0.0419(8) 0.0403(9) 0.0385(8) -0.0036(7) 0.0226(7) -0.0121(7)
C39 0.0510(10) 0.0699(14) 0.0529(10) -0.0022(9) 0.0343(9) -0.0165(9)
C40 0.0484(10) 0.0922(17) 0.0457(10) 0.0195(10) 0.0202(8) -0.0246(11)
C41 0.0485(10) 0.0662(14) 0.0483(10) 0.0316(9) 0.0038(8) -0.0207(9)
C42 0.0353(8) 0.0422(10) 0.0403(8) 0.0157(7) 0.0081(6) -0.0075(7)
C43 0.0315(7) 0.0197(7) 0.0287(6) 0.0025(5) 0.0129(5) 0.0006(5)
C44 0.0303(7) 0.0264(7) 0.0338(7) -0.0007(6) 0.0117(6) -0.0004(5)
C45 0.0297(7) 0.0335(8) 0.0401(8) 0.0055(6) 0.0085(6) -0.0008(6)
C46 0.0373(8) 0.0443(10) 0.0601(11) 0.0074(8) 0.0167(8) 0.0149(7)
C47 0.0586(11) 0.0558(12) 0.0574(11) -0.0076(9) 0.0237(9) 0.0241(10)
C48 0.0487(9) 0.0397(10) 0.0368(8) -0.0043(7) 0.0132(7) 0.0122(7)
C49 0.0362(7) 0.0181(6) 0.0229(6) 0.0002(5) 0.0078(5) 0.0007(5)
C50 0.0338(7) 0.0268(7) 0.0324(7) -0.0033(6) 0.0074(6) -0.0008(6)
C51 0.0416(8) 0.0314(9) 0.0386(8) -0.0070(7) 0.0011(7) -0.0007(7)
C52 0.0639(11) 0.0324(9) 0.0267(7) -0.0067(6) 0.0019(7) 0.0046(8)
C53 0.0776(12) 0.0319(9) 0.0265(7) -0.0005(6) 0.0195(8) 0.0029(8)
C54 0.0516(9) 0.0257(8) 0.0285(7) 0.0010(6) 0.0154(6) -0.0023(6)
O1 0.0425(6) 0.0173(5) 0.0304(5) 0.0002(4) 0.0142(4) 0.0011(4)
P1 0.02124(15) 0.02110(17) 0.02658(16) -0.00290(12) 0.01129(13) -0.00134(12)
P2 0.01948(14) 0.02014(17) 0.02543(16) 0.00229(12) 0.00932(12) -0.00019(11)
P3 0.02571(15) 0.01796(15) 0.02194(15) -0.00018(12) 0.00922(12) -0.00291(12)
Cl1A 0.0159(2) 0.0426(3) 0.0290(2) -0.00159(18) 0.00679(19) -0.00059(18)
N1A 0.0173(7) 0.0234(7) 0.0228(6) 0.0024(5) 0.0067(5) -0.0003(5)
O1A 0.0139(7) 0.0465(9) 0.0383(8) 0.0039(6) 0.0075(6) -0.0050(6)
Cl1B 0.0159(2) 0.0426(3) 0.0290(2) -0.00159(18) 0.00679(19) -0.00059(18)
N1B 0.0173(7) 0.0234(7) 0.0228(6) 0.0024(5) 0.0067(5) -0.0003(5)
O1B 0.0139(7) 0.0465(9) 0.0383(8) 0.0039(6) 0.0075(6) -0.0050(6)
Mo1 0.01524(5) 0.01674(5) 0.02174(5) -0.00010(4) 0.00697(4) -0.00071(4)
 
_geom_special_details
;
 All esds (except the esd in the dihedral angle between two l.s. planes)
 are estimated using the full covariance matrix.  The cell esds are taken
 into account individually in the estimation of esds in distances, angles
 and torsion angles; correlations between esds in cell parameters are only
 used when they are defined by crystal symmetry.  An approximate (isotropic)
 treatment of cell esds is used for estimating esds involving l.s. planes.
;
 
loop_
 _geom_bond_atom_site_label_1
 _geom_bond_atom_site_label_2
 _geom_bond_distance
 _geom_bond_site_symmetry_2
 _geom_bond_publ_flag
C1 C6 1.3941(18) . ?
C1 C2 1.3967(19) . ?
C1 P1 1.8210(13) . ?
C2 C3 1.3794(19) . ?
C2 H2 0.9300 . ?
C3 C4 1.385(2) . ?
C3 H3 0.9300 . ?
C4 C5 1.378(2) . ?
C4 H4 0.9300 . ?
C5 C6 1.389(2) . ?
C5 H5 0.9300 . ?
C6 H6 0.9300 . ?
C7 C8 1.3908(19) . ?
C7 C12 1.3912(19) . ?
C7 P1 1.8402(13) . ?
C8 C9 1.3896(19) . ?
C8 H8 0.9300 . ?
C9 C10 1.371(2) . ?
C9 H9 0.9300 . ?
C10 C11 1.369(3) . ?
C10 H10 0.9300 . ?
C11 C12 1.386(2) . ?
C11 H11 0.9300 . ?
C12 H12 0.9300 . ?
C13 C18 1.391(2) . ?
C13 C14 1.3989(19) . ?
C13 P1 1.8480(14) . ?
C14 C15 1.390(2) . ?
C14 H14 0.9300 . ?
C15 C16 1.377(2) . ?
C15 H15 0.9300 . ?
C16 C17 1.395(2) . ?
C16 H16 0.9300 . ?
C17 C18 1.3907(19) . ?
C17 H17 0.9300 . ?
C18 O1 1.4073(16) . ?
C19 C24 1.388(2) . ?
C19 C20 1.3989(19) . ?
C19 P2 1.8488(14) . ?
C20 C21 1.394(2) . ?
C20 H20 0.9300 . ?
C21 C22 1.371(3) . ?
C21 H21 0.9300 . ?
C22 C23 1.389(2) . ?
C22 H22 0.9300 . ?
C23 C24 1.3883(19) . ?
C23 H23 0.9300 . ?
C24 O1 1.4090(16) . ?
C25 C30 1.3836(19) . ?
C25 C26 1.3977(18) . ?
C25 P2 1.8379(13) . ?
C26 C27 1.387(2) . ?
C26 H26 0.9300 . ?
C27 C28 1.375(2) . ?
C27 H27 0.9300 . ?
C28 C29 1.378(2) . ?
C28 H28 0.9300 . ?
C29 C30 1.394(2) . ?
C29 H29 0.9300 . ?
C30 H30 0.9300 . ?
C31 C32 1.3857(18) . ?
C31 C36 1.3944(19) . ?
C31 P2 1.8235(12) . ?
C32 C33 1.3919(17) . ?
C32 H32 0.9300 . ?
C33 C34 1.374(2) . ?
C33 H33 0.9300 . ?
C34 C35 1.374(2) . ?
C34 H34 0.9300 . ?
C35 C36 1.390(2) . ?
C35 H35 0.9300 . ?
C36 H36 0.9300 . ?
C37 C38 1.388(2) . ?
C37 C42 1.389(2) . ?
C37 P3 1.8413(13) . ?
C38 C39 1.392(2) . ?
C38 H38 0.9300 . ?
C39 C40 1.369(3) . ?
C39 H39 0.9300 . ?
C40 C41 1.375(3) . ?
C40 H40 0.9300 . ?
C41 C42 1.397(2) . ?
C41 H41 0.9300 . ?
C42 H42 0.9300 . ?
C43 C48 1.384(2) . ?
C43 C44 1.3989(19) . ?
C43 P3 1.8357(14) . ?
C44 C45 1.384(2) . ?
C44 H44 0.9300 . ?
C45 C46 1.375(2) . ?
C45 H45 0.9300 . ?
C46 C47 1.379(2) . ?
C46 H46 0.9300 . ?
C47 C48 1.387(2) . ?
C47 H47 0.9300 . ?
C48 H48 0.9300 . ?
C49 C54 1.393(2) . ?
C49 C50 1.394(2) . ?
C49 P3 1.8404(13) . ?
C50 C51 1.390(2) . ?
C50 H50 0.9300 . ?
C51 C52 1.373(2) . ?
C51 H51 0.9300 . ?
C52 C53 1.380(3) . ?
C52 H52 0.9300 . ?
C53 C54 1.382(2) . ?
C53 H53 0.9300 . ?
C54 H54 0.9300 . ?
O1 Mo1 2.2914(10) . ?
P1 Mo1 2.4681(3) . ?
P2 Mo1 2.4840(3) . ?
P3 Mo1 2.4225(4) . ?
Cl1A Mo1 2.4880(19) . ?
N1A O1A 1.198(4) . ?
N1A Mo1 1.745(4) . ?
Cl1B Mo1 2.4906(5) . ?
N1B O1B 1.209(2) . ?
N1B Mo1 1.7710(15) . ?
 
loop_
 _geom_angle_atom_site_label_1
 _geom_angle_atom_site_label_2
 _geom_angle_atom_site_label_3
 _geom_angle
 _geom_angle_site_symmetry_1
 _geom_angle_site_symmetry_3
 _geom_angle_publ_flag
C6 C1 C2 118.91(13) . . ?
C6 C1 P1 121.88(11) . . ?
C2 C1 P1 119.07(10) . . ?
C3 C2 C1 120.48(13) . . ?
C3 C2 H2 119.8 . . ?
C1 C2 H2 119.8 . . ?
C2 C3 C4 120.25(15) . . ?
C2 C3 H3 119.9 . . ?
C4 C3 H3 119.9 . . ?
C5 C4 C3 119.75(14) . . ?
C5 C4 H4 120.1 . . ?
C3 C4 H4 120.1 . . ?
C4 C5 C6 120.55(13) . . ?
C4 C5 H5 119.7 . . ?
C6 C5 H5 119.7 . . ?
C5 C6 C1 119.97(14) . . ?
C5 C6 H6 120.0 . . ?
C1 C6 H6 120.0 . . ?
C8 C7 C12 118.32(12) . . ?
C8 C7 P1 122.36(10) . . ?
C12 C7 P1 119.28(10) . . ?
C9 C8 C7 120.47(14) . . ?
C9 C8 H8 119.8 . . ?
C7 C8 H8 119.8 . . ?
C10 C9 C8 120.45(15) . . ?
C10 C9 H9 119.8 . . ?
C8 C9 H9 119.8 . . ?
C11 C10 C9 119.64(14) . . ?
C11 C10 H10 120.2 . . ?
C9 C10 H10 120.2 . . ?
C10 C11 C12 120.76(15) . . ?
C10 C11 H11 119.6 . . ?
C12 C11 H11 119.6 . . ?
C11 C12 C7 120.37(15) . . ?
C11 C12 H12 119.8 . . ?
C7 C12 H12 119.8 . . ?
C18 C13 C14 117.35(13) . . ?
C18 C13 P1 119.39(10) . . ?
C14 C13 P1 123.23(11) . . ?
C15 C14 C13 121.25(15) . . ?
C15 C14 H14 119.4 . . ?
C13 C14 H14 119.4 . . ?
C16 C15 C14 119.89(15) . . ?
C16 C15 H15 120.1 . . ?
C14 C15 H15 120.1 . . ?
C15 C16 C17 120.60(14) . . ?
C15 C16 H16 119.7 . . ?
C17 C16 H16 119.7 . . ?
C18 C17 C16 118.49(15) . . ?
C18 C17 H17 120.8 . . ?
C16 C17 H17 120.8 . . ?
C17 C18 C13 122.35(13) . . ?
C17 C18 O1 120.96(13) . . ?
C13 C18 O1 116.54(12) . . ?
C24 C19 C20 117.20(13) . . ?
C24 C19 P2 118.67(10) . . ?
C20 C19 P2 123.70(11) . . ?
C21 C20 C19 120.83(15) . . ?
C21 C20 H20 119.6 . . ?
C19 C20 H20 119.6 . . ?
C22 C21 C20 120.12(15) . . ?
C22 C21 H21 119.9 . . ?
C20 C21 H21 119.9 . . ?
C21 C22 C23 120.72(15) . . ?
C21 C22 H22 119.6 . . ?
C23 C22 H22 119.6 . . ?
C24 C23 C22 118.35(15) . . ?
C24 C23 H23 120.8 . . ?
C22 C23 H23 120.8 . . ?
C23 C24 C19 122.70(14) . . ?
C23 C24 O1 121.26(13) . . ?
C19 C24 O1 115.84(11) . . ?
C30 C25 C26 119.06(13) . . ?
C30 C25 P2 123.00(10) . . ?
C26 C25 P2 117.83(11) . . ?
C27 C26 C25 120.24(14) . . ?
C27 C26 H26 119.9 . . ?
C25 C26 H26 119.9 . . ?
C28 C27 C26 120.14(14) . . ?
C28 C27 H27 119.9 . . ?
C26 C27 H27 119.9 . . ?
C27 C28 C29 120.17(14) . . ?
C27 C28 H28 119.9 . . ?
C29 C28 H28 119.9 . . ?
C28 C29 C30 120.13(15) . . ?
C28 C29 H29 119.9 . . ?
C30 C29 H29 119.9 . . ?
C25 C30 C29 120.24(14) . . ?
C25 C30 H30 119.9 . . ?
C29 C30 H30 119.9 . . ?
C32 C31 C36 118.86(12) . . ?
C32 C31 P2 122.51(10) . . ?
C36 C31 P2 118.49(10) . . ?
C31 C32 C33 120.45(13) . . ?
C31 C32 H32 119.8 . . ?
C33 C32 H32 119.8 . . ?
C34 C33 C32 120.21(14) . . ?
C34 C33 H33 119.9 . . ?
C32 C33 H33 119.9 . . ?
C35 C34 C33 119.89(13) . . ?
C35 C34 H34 120.1 . . ?
C33 C34 H34 120.1 . . ?
C34 C35 C36 120.52(14) . . ?
C34 C35 H35 119.7 . . ?
C36 C35 H35 119.7 . . ?
C35 C36 C31 120.04(15) . . ?
C35 C36 H36 120.0 . . ?
C31 C36 H36 120.0 . . ?
C38 C37 C42 118.88(14) . . ?
C38 C37 P3 118.20(11) . . ?
C42 C37 P3 122.63(12) . . ?
C37 C38 C39 120.54(17) . . ?
C37 C38 H38 119.7 . . ?
C39 C38 H38 119.7 . . ?
C40 C39 C38 120.16(19) . . ?
C40 C39 H39 119.9 . . ?
C38 C39 H39 119.9 . . ?
C39 C40 C41 120.12(16) . . ?
C39 C40 H40 119.9 . . ?
C41 C40 H40 119.9 . . ?
C40 C41 C42 120.29(18) . . ?
C40 C41 H41 119.9 . . ?
C42 C41 H41 119.9 . . ?
C37 C42 C41 120.01(17) . . ?
C37 C42 H42 120.0 . . ?
C41 C42 H42 120.0 . . ?
C48 C43 C44 117.98(13) . . ?
C48 C43 P3 124.93(11) . . ?
C44 C43 P3 117.06(10) . . ?
C45 C44 C43 120.77(14) . . ?
C45 C44 H44 119.6 . . ?
C43 C44 H44 119.6 . . ?
C46 C45 C44 120.42(15) . . ?
C46 C45 H45 119.8 . . ?
C44 C45 H45 119.8 . . ?
C45 C46 C47 119.49(15) . . ?
C45 C46 H46 120.3 . . ?
C47 C46 H46 120.3 . . ?
C46 C47 C48 120.34(16) . . ?
C46 C47 H47 119.8 . . ?
C48 C47 H47 119.8 . . ?
C43 C48 C47 120.98(15) . . ?
C43 C48 H48 119.5 . . ?
C47 C48 H48 119.5 . . ?
C54 C49 C50 118.23(13) . . ?
C54 C49 P3 118.72(11) . . ?
C50 C49 P3 122.96(11) . . ?
C51 C50 C49 120.19(15) . . ?
C51 C50 H50 119.9 . . ?
C49 C50 H50 119.9 . . ?
C52 C51 C50 120.76(16) . . ?
C52 C51 H51 119.6 . . ?
C50 C51 H51 119.6 . . ?
C51 C52 C53 119.61(14) . . ?
C51 C52 H52 120.2 . . ?
C53 C52 H52 120.2 . . ?
C52 C53 C54 120.11(16) . . ?
C52 C53 H53 119.9 . . ?
C54 C53 H53 119.9 . . ?
C53 C54 C49 121.07(15) . . ?
C53 C54 H54 119.5 . . ?
C49 C54 H54 119.5 . . ?
C18 O1 C24 121.52(11) . . ?
C18 O1 Mo1 119.80(8) . . ?
C24 O1 Mo1 118.60(8) . . ?
C1 P1 C7 102.85(6) . . ?
C1 P1 C13 103.07(6) . . ?
C7 P1 C13 101.25(6) . . ?
C1 P1 Mo1 117.48(4) . . ?
C7 P1 Mo1 128.40(4) . . ?
C13 P1 Mo1 99.56(4) . . ?
C31 P2 C25 104.47(6) . . ?
C31 P2 C19 104.63(6) . . ?
C25 P2 C19 99.04(6) . . ?
C31 P2 Mo1 112.08(4) . . ?
C25 P2 Mo1 133.04(4) . . ?
C19 P2 Mo1 99.16(4) . . ?
C43 P3 C49 104.10(6) . . ?
C43 P3 C37 101.38(6) . . ?
C49 P3 C37 99.03(6) . . ?
C43 P3 Mo1 114.66(4) . . ?
C49 P3 Mo1 116.62(4) . . ?
C37 P3 Mo1 118.55(5) . . ?
O1A N1A Mo1 178.3(5) . . ?
O1B N1B Mo1 178.82(13) . . ?
N1A Mo1 N1B 177.19(16) . . ?
N1A Mo1 O1 89.84(16) . . ?
N1B Mo1 O1 92.39(5) . . ?
N1A Mo1 P3 86.68(15) . . ?
N1B Mo1 P3 91.16(5) . . ?
O1 Mo1 P3 175.81(3) . . ?
N1A Mo1 P1 95.41(15) . . ?
N1B Mo1 P1 86.77(4) . . ?
O1 Mo1 P1 76.44(2) . . ?
P3 Mo1 P1 101.565(11) . . ?
N1A Mo1 P2 87.93(15) . . ?
N1B Mo1 P2 91.00(4) . . ?
O1 Mo1 P2 75.10(2) . . ?
P3 Mo1 P2 107.063(11) . . ?
P1 Mo1 P2 151.326(13) . . ?
N1A Mo1 Cl1A 176.89(16) . . ?
N1B Mo1 Cl1A 5.50(7) . . ?
O1 Mo1 Cl1A 87.07(5) . . ?
P3 Mo1 Cl1A 96.43(5) . . ?
P1 Mo1 Cl1A 84.17(4) . . ?
P2 Mo1 Cl1A 90.97(4) . . ?
N1A Mo1 Cl1B 4.99(15) . . ?
N1B Mo1 Cl1B 175.33(5) . . ?
O1 Mo1 Cl1B 85.50(3) . . ?
P3 Mo1 Cl1B 91.117(15) . . ?
P1 Mo1 Cl1B 96.760(14) . . ?
P2 Mo1 Cl1B 84.438(13) . . ?
Cl1A Mo1 Cl1B 172.06(5) . . ?
 
_diffrn_measured_fraction_theta_max    0.999
_diffrn_reflns_theta_full              30.51
_diffrn_measured_fraction_theta_full   0.999
_refine_diff_density_max    0.393
_refine_diff_density_min   -0.610
_refine_diff_density_rms    0.050

_iucr_refine_instructions_details
;
TITL subr0206 in P2(1)/n
CELL  0.71073  19.3956  12.6738  20.4746   90.000  114.639   90.000
ZERR     4.00   0.0003   0.0002   0.0003    0.000    0.002    0.000
LATT   1
SYMM  1/2 - X, 1/2 + Y, 1/2 - Z
SFAC  C    H    N    O    P    CL   MO
UNIT  216  172  4    8    12   4    4
MERG   2
SHEL 100 0.7
SADI 0.005 MO1 CL1A MO1 CL1B
SADI 0.005 MO1 N1A MO1 N1B
SADI 0.005 N1A O1A N1B O1B
SADI 0.010 MO1 O1A MO1 O1B
EADP CL1A CL1B
EADP N1A N1B
EADP O1A O1B
ACTA
FMAP   2
PLAN   25
BOND   $H
L.S.   6
WGHT    0.039600    0.488000
FVAR       2.49463   0.23562
C1    1    0.313737    0.314895    0.691911    11.00000    0.02149    0.02417 =
         0.02707   -0.00680    0.00837    0.00130
C2    1    0.290047    0.232918    0.723329    11.00000    0.02243    0.02254 =
         0.03549   -0.00365    0.00863    0.00094
AFIX  43
H2    2    0.239244    0.213186    0.703898    11.00000   -1.20000
AFIX   0
C3    1    0.341453    0.181007    0.782966    11.00000    0.03191    0.02440 =
         0.04379    0.00296    0.00966    0.00418
AFIX  43
H3    2    0.324916    0.127873    0.804340    11.00000   -1.20000
AFIX   0
C4    1    0.417585    0.207709    0.811130    11.00000    0.02976    0.03206 =
         0.04457    0.00011    0.00111    0.00846
AFIX  43
H4    2    0.452064    0.173189    0.851676    11.00000   -1.20000
AFIX   0
C5    1    0.442066    0.285617    0.778858    11.00000    0.01974    0.03453 =
         0.05112   -0.01166    0.00489    0.00200
AFIX  43
H5    2    0.493398    0.302170    0.796989    11.00000   -1.20000
AFIX   0
C6    1    0.390715    0.339638    0.719469    11.00000    0.02299    0.02954 =
         0.04130   -0.00827    0.01387   -0.00184
AFIX  43
H6    2    0.407679    0.392287    0.698102    11.00000   -1.20000
AFIX   0
C7    1    0.163342    0.399805    0.635707    11.00000    0.02385    0.02130 =
         0.03270   -0.00024    0.01403    0.00131
C8    1    0.172023    0.407880    0.706465    11.00000    0.03282    0.02722 =
         0.03449    0.00365    0.01691    0.00719
AFIX  43
H8    2    0.219986    0.401308    0.743874    11.00000   -1.20000
AFIX   0
C9    1    0.109540    0.425697    0.721663    11.00000    0.05121    0.02929 =
         0.05018    0.00800    0.03612    0.00874
AFIX  43
H9    2    0.115949    0.430730    0.769172    11.00000   -1.20000
AFIX   0
C10   1    0.038513    0.435905    0.667096    11.00000    0.03718    0.03780 =
         0.07016    0.00354    0.03603    0.00414
AFIX  43
H10   2   -0.003204    0.447383    0.677498    11.00000   -1.20000
AFIX   0
C11   1    0.029335    0.429110    0.597221    11.00000    0.02482    0.05955 =
         0.06138   -0.00311    0.01459    0.00608
AFIX  43
H11   2   -0.018785    0.436689    0.560206    11.00000   -1.20000
AFIX   0
C12   1    0.090942    0.411062    0.580995    11.00000    0.02800    0.04739 =
         0.03684   -0.00320    0.01134    0.00558
AFIX  43
H12   2    0.083838    0.406454    0.533272    11.00000   -1.20000
AFIX   0
C13   1    0.281660    0.515642    0.620229    11.00000    0.02534    0.02115 =
         0.03619   -0.00597    0.01571   -0.00148
C14   1    0.315831    0.569255    0.685696    11.00000    0.03519    0.02979 =
         0.03952   -0.01040    0.01868   -0.00377
AFIX  43
H14   2    0.317297    0.537788    0.727290    11.00000   -1.20000
AFIX   0
C15   1    0.347627    0.668641    0.689756    11.00000    0.04204    0.03105 =
         0.05004   -0.01841    0.02007   -0.00799
AFIX  43
H15   2    0.370282    0.702989    0.733783    11.00000   -1.20000
AFIX   0
C16   1    0.345534    0.716184    0.628483    11.00000    0.03996    0.02452 =
         0.06397   -0.01304    0.02786   -0.00932
AFIX  43
H16   2    0.367319    0.782388    0.631440    11.00000   -1.20000
AFIX   0
C17   1    0.311030    0.665938    0.562011    11.00000    0.03946    0.02129 =
         0.05159   -0.00329    0.02577   -0.00233
AFIX  43
H17   2    0.309836    0.697690    0.520602    11.00000   -1.20000
AFIX   0
C18   1    0.278462    0.567295    0.559074    11.00000    0.02783    0.02137 =
         0.03808   -0.00501    0.01695    0.00037
C19   1    0.210629    0.512040    0.368397    11.00000    0.01978    0.02241 =
         0.03533    0.00617    0.01207    0.00143
C20   1    0.173521    0.560743    0.301410    11.00000    0.02910    0.03079 =
         0.03860    0.00932    0.01263    0.00188
AFIX  43
H20   2    0.173975    0.528830    0.260689    11.00000   -1.20000
AFIX   0
C21   1    0.135867    0.656528    0.294932    11.00000    0.03512    0.03563 =
         0.04996    0.01947    0.01300    0.00868
AFIX  43
H21   2    0.111981    0.688501    0.250165    11.00000   -1.20000
AFIX   0
C22   1    0.133990    0.703655    0.354418    11.00000    0.03716    0.02836 =
         0.06860    0.01454    0.02241    0.01366
AFIX  43
H22   2    0.108132    0.767023    0.349575    11.00000   -1.20000
AFIX   0
C23   1    0.170274    0.657822    0.421841    11.00000    0.03740    0.02592 =
         0.05466    0.00573    0.02414    0.00748
AFIX  43
H23   2    0.168462    0.689202    0.462155    11.00000   -1.20000
AFIX   0
C24   1    0.209320    0.563996    0.427571    11.00000    0.02715    0.01965 =
         0.03943    0.00495    0.01547    0.00126
C25   1    0.200749    0.329161    0.287863    11.00000    0.02517    0.02252 =
         0.02626    0.00305    0.00746   -0.00013
C26   1    0.123949    0.303655    0.263664    11.00000    0.02488    0.03662 =
         0.03613   -0.00049    0.00878   -0.00311
AFIX  43
H26   2    0.100801    0.306062    0.295310    11.00000   -1.20000
AFIX   0
C27   1    0.082121    0.274759    0.192604    11.00000    0.02864    0.03518 =
         0.04127   -0.00159    0.00113   -0.00003
AFIX  43
H27   2    0.031043    0.257800    0.176758    11.00000   -1.20000
AFIX   0
C28   1    0.116035    0.271144    0.145550    11.00000    0.04740    0.03257 =
         0.02887   -0.00056    0.00076    0.00326
AFIX  43
H28   2    0.087611    0.252997    0.097746    11.00000   -1.20000
AFIX   0
C29   1    0.192005    0.294335    0.169043    11.00000    0.05097    0.04348 =
         0.03113   -0.00075    0.01787    0.00115
AFIX  43
H29   2    0.214929    0.290732    0.137248    11.00000   -1.20000
AFIX   0
C30   1    0.234568    0.323180    0.240353    11.00000    0.03248    0.03443 =
         0.03257    0.00087    0.01382   -0.00128
AFIX  43
H30   2    0.285891    0.338465    0.256065    11.00000   -1.20000
AFIX   0
C31   1    0.348311    0.395904    0.392335    11.00000    0.01987    0.02618 =
         0.02222    0.00175    0.00805    0.00050
C32   1    0.380046    0.494934    0.396153    11.00000    0.02294    0.02778 =
         0.02903    0.00056    0.01064   -0.00098
AFIX  43
H32   2    0.350242    0.554868    0.389696    11.00000   -1.20000
AFIX   0
C33   1    0.456228    0.505317    0.409586    11.00000    0.02545    0.03911 =
         0.03739   -0.00080    0.01227   -0.00818
AFIX  43
H33   2    0.477252    0.572099    0.412730    11.00000   -1.20000
AFIX   0
C34   1    0.500477    0.417191    0.418218    11.00000    0.01966    0.05658 =
         0.03258   -0.00030    0.00894    0.00182
AFIX  43
H34   2    0.551197    0.424305    0.426565    11.00000   -1.20000
AFIX   0
C35   1    0.469662    0.318587    0.414497    11.00000    0.02756    0.04218 =
         0.05198    0.00276    0.01520    0.01187
AFIX  43
H35   2    0.499597    0.259052    0.419944    11.00000   -1.20000
AFIX   0
C36   1    0.394115    0.307088    0.402657    11.00000    0.02924    0.02838 =
         0.05536    0.00372    0.01571    0.00379
AFIX  43
H36   2    0.374090    0.240114    0.401617    11.00000   -1.20000
AFIX   0
C37   1    0.183456    0.082459    0.549494    11.00000    0.03129    0.03130 =
         0.02177    0.00019    0.00763   -0.01244
C38   1    0.124571    0.138584    0.554847    11.00000    0.04192    0.04026 =
         0.03846   -0.00358    0.02261   -0.01211
AFIX  43
H38   2    0.113931    0.206751    0.536546    11.00000   -1.20000
AFIX   0
C39   1    0.081303    0.093658    0.587393    11.00000    0.05103    0.06989 =
         0.05290   -0.00219    0.03427   -0.01648
AFIX  43
H39   2    0.041806    0.131748    0.590521    11.00000   -1.20000
AFIX   0
C40   1    0.096766   -0.006457    0.614799    11.00000    0.04843    0.09220 =
         0.04565    0.01948    0.02015   -0.02458
AFIX  43
H40   2    0.067564   -0.036388    0.636246    11.00000   -1.20000
AFIX   0
C41   1    0.155386   -0.062828    0.610675    11.00000    0.04847    0.06616 =
         0.04831    0.03157    0.00378   -0.02073
AFIX  43
H41   2    0.165948   -0.130610    0.629681    11.00000   -1.20000
AFIX   0
C42   1    0.199162   -0.018717    0.578051    11.00000    0.03531    0.04225 =
         0.04034    0.01569    0.00810   -0.00753
AFIX  43
H42   2    0.238815   -0.057086    0.575453    11.00000   -1.20000
AFIX   0
C43   1    0.321838    0.069217    0.533132    11.00000    0.03150    0.01971 =
         0.02868    0.00247    0.01295    0.00057
C44   1    0.370529    0.087939    0.605050    11.00000    0.03033    0.02638 =
         0.03379   -0.00073    0.01169   -0.00041
AFIX  43
H44   2    0.355500    0.133418    0.632329    11.00000   -1.20000
AFIX   0
C45   1    0.440795    0.039576    0.636072    11.00000    0.02972    0.03353 =
         0.04013    0.00547    0.00846   -0.00082
AFIX  43
H45   2    0.472158    0.051757    0.684194    11.00000   -1.20000
AFIX   0
C46   1    0.464550   -0.026388    0.596197    11.00000    0.03731    0.04434 =
         0.06006    0.00744    0.01670    0.01492
AFIX  43
H46   2    0.512027   -0.058196    0.617034    11.00000   -1.20000
AFIX   0
C47   1    0.417421   -0.045003    0.525072    11.00000    0.05855    0.05577 =
         0.05744   -0.00764    0.02368    0.02409
AFIX  43
H47   2    0.433465   -0.088842    0.497704    11.00000   -1.20000
AFIX   0
C48   1    0.346242    0.001308    0.494159    11.00000    0.04869    0.03969 =
         0.03677   -0.00433    0.01320    0.01222
AFIX  43
H48   2    0.314423   -0.013469    0.446538    11.00000   -1.20000
AFIX   0
C49   1    0.176165    0.075808    0.410060    11.00000    0.03617    0.01815 =
         0.02295    0.00018    0.00781    0.00067
C50   1    0.109320    0.020247    0.395537    11.00000    0.03380    0.02682 =
         0.03235   -0.00329    0.00740   -0.00077
AFIX  43
H50   2    0.091933    0.012045    0.431253    11.00000   -1.20000
AFIX   0
C51   1    0.068595   -0.022913    0.327844    11.00000    0.04155    0.03142 =
         0.03863   -0.00697    0.00113   -0.00067
AFIX  43
H51   2    0.023728   -0.059092    0.318441    11.00000   -1.20000
AFIX   0
C52   1    0.093848   -0.012753    0.274669    11.00000    0.06388    0.03238 =
         0.02674   -0.00673    0.00190    0.00464
AFIX  43
H52   2    0.066711   -0.042940    0.229775    11.00000   -1.20000
AFIX   0
C53   1    0.159737    0.042523    0.288256    11.00000    0.07765    0.03194 =
         0.02649   -0.00045    0.01954    0.00289
AFIX  43
H53   2    0.177095    0.049604    0.252443    11.00000   -1.20000
AFIX   0
C54   1    0.199962    0.087369    0.354998    11.00000    0.05162    0.02569 =
         0.02854    0.00102    0.01543   -0.00228
AFIX  43
H54   2    0.243633    0.125894    0.363272    11.00000   -1.20000
AFIX   0
O1    4    0.245118    0.511397    0.493914    11.00000    0.04250    0.01726 =
         0.03037    0.00018    0.01422    0.00106
P1    5    0.244314    0.379845    0.612334    11.00000    0.02124    0.02110 =
         0.02658   -0.00290    0.01129   -0.00134
P2    5    0.250583    0.377291    0.380541    11.00000    0.01948    0.02014 =
         0.02543    0.00229    0.00932   -0.00019
P3    5    0.231177    0.140457    0.496856    11.00000    0.02571    0.01796 =
         0.02194   -0.00018    0.00922   -0.00291
PART    1
CL1A  6    0.383170    0.337262    0.560721    21.00000    0.01591    0.04256 =
         0.02898   -0.00159    0.00679   -0.00059
N1A   3    0.144041    0.333443    0.448401    21.00000    0.01726    0.02344 =
         0.02284    0.00242    0.00674   -0.00028
O1A   4    0.076408    0.332646    0.416125    21.00000    0.01391    0.04652 =
         0.03828    0.00390    0.00750   -0.00504
PART    2
CL1B  6    0.103268    0.349317    0.423684   -21.00000    0.01591    0.04256 =
         0.02898   -0.00159    0.00679   -0.00059
N1B   3    0.342706    0.322315    0.539869   -21.00000    0.01726    0.02344 =
         0.02284    0.00242    0.00674   -0.00028
O1B   4    0.411108    0.316329    0.569305   -21.00000    0.01391    0.04652 =
         0.03828    0.00390    0.00750   -0.00504
PART    0
MO1   7    0.242622    0.330661    0.495036    11.00000    0.01524    0.01674 =
         0.02174   -0.00010    0.00697   -0.00071
HKLF    4
 
REM  subr0206 in P2(1)/n
REM R1 =  0.0270 for  11579 Fo > 4sig(Fo)  and  0.0361 for all  13957 data
REM    569 parameters refined using      4 restraints
 
END
 
WGHT      0.0396      0.4904
REM Highest difference peak  0.393,  deepest hole -0.610,  1-sigma level  0.050
Q1    1   0.2201  0.3487  0.3225  11.00000  0.05    0.39
Q2    1   0.2574  0.3745  0.5327  11.00000  0.05    0.39
Q3    1   0.2319  0.4496  0.3785  11.00000  0.05    0.37
Q4    1   0.0727  0.3776  0.3963  11.00000  0.05    0.35
Q5    1   0.3083  0.2780  0.7176  11.00000  0.05    0.34
Q6    1   0.3365  0.6759  0.5995  11.00000  0.05    0.33
Q7    1   0.3080  0.3834  0.3899  11.00000  0.05    0.33
Q8    1   0.2678  0.4574  0.6204  11.00000  0.05    0.33
Q9    1   0.2434  0.3353  0.4070  11.00000  0.05    0.32
Q10   1   0.2107  0.1086  0.4494  11.00000  0.05    0.32
Q11   1   0.2254  0.2718  0.4559  11.00000  0.05    0.32
Q12   1   0.3695  0.4405  0.3981  11.00000  0.05    0.32
Q13   1   0.3516  0.3284  0.7120  11.00000  0.05    0.32
Q14   1   0.1983  0.3902  0.6209  11.00000  0.05    0.32
Q15   1   0.2762  0.5383  0.5922  11.00000  0.05    0.31
Q16   1   0.1956  0.5478  0.3383  11.00000  0.05    0.31
Q17   1   0.2771  0.1034  0.5168  11.00000  0.05    0.31
Q18   1   0.2100  0.1104  0.5313  11.00000  0.05    0.31
Q19   1   0.1799  0.0949  0.3797  11.00000  0.05    0.31
Q20   1   0.1623  0.1101  0.5685  11.00000  0.05    0.30
Q21   1   0.2266  0.3780  0.4545  11.00000  0.05    0.30
Q22   1   0.1663  0.4242  0.6698  11.00000  0.05    0.30
Q23   1   0.2127  0.3011  0.2074  11.00000  0.05    0.29
Q24   1   0.2830  0.3417  0.6490  11.00000  0.05    0.29
Q25   1   0.3067  0.6118  0.5633  11.00000  0.05    0.29
;
